# Supplementary material for: Reading canonical and modified nucleobases in 16S ribosomal RNA using nanopore native RNA sequencing
Source: PubMed Central journal article supplement (PMC6522004; doi:10.1371/journal.pone.0216709), 2019-05-16

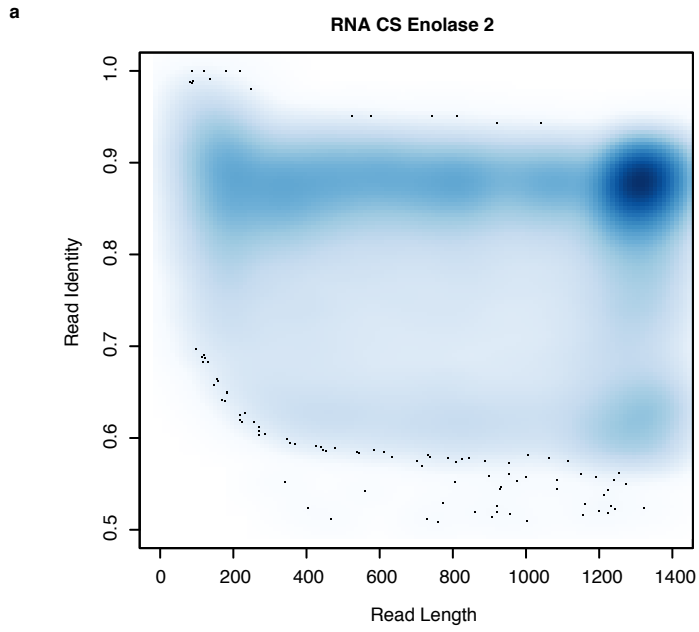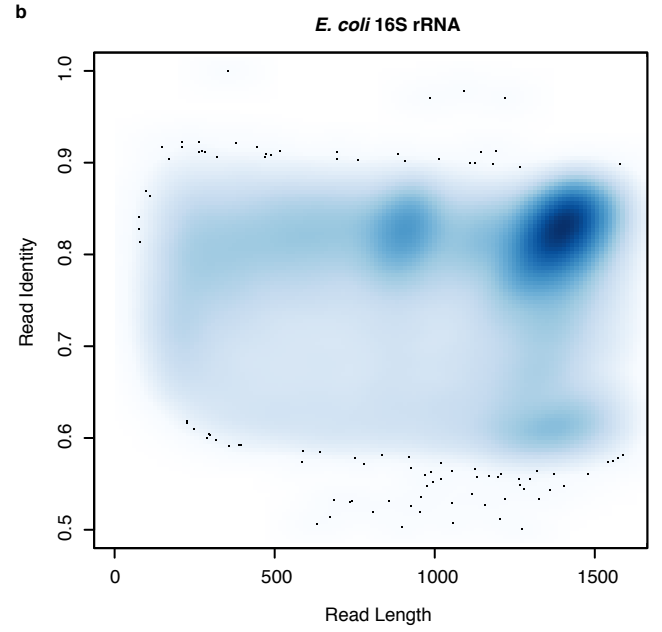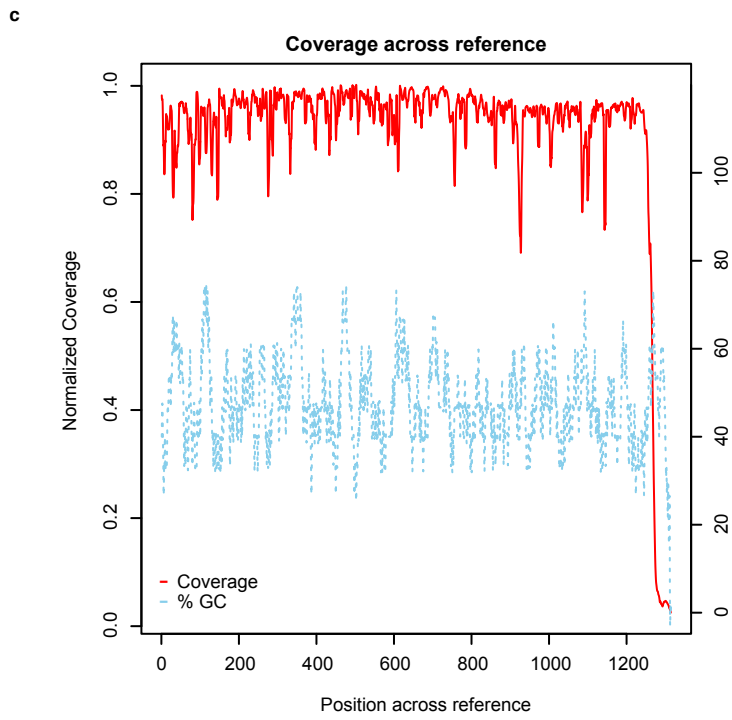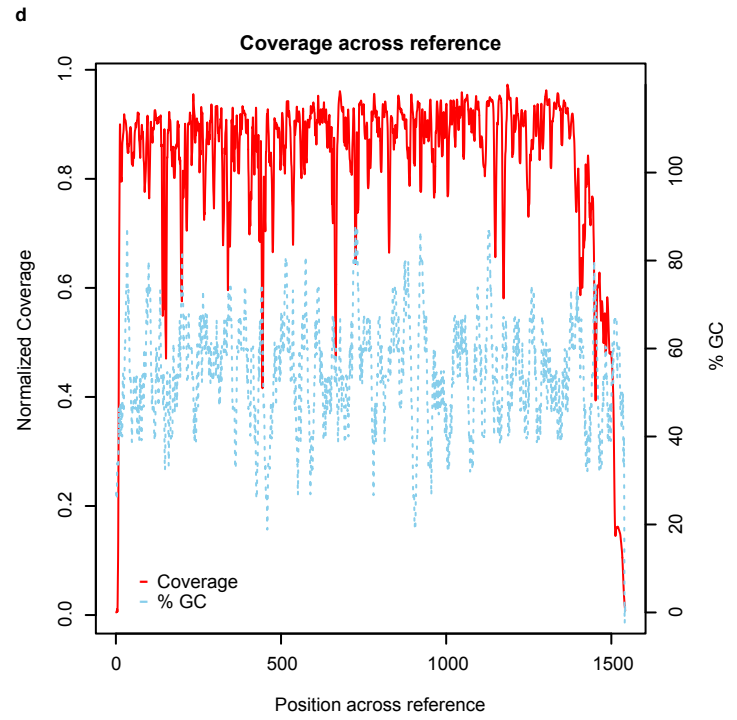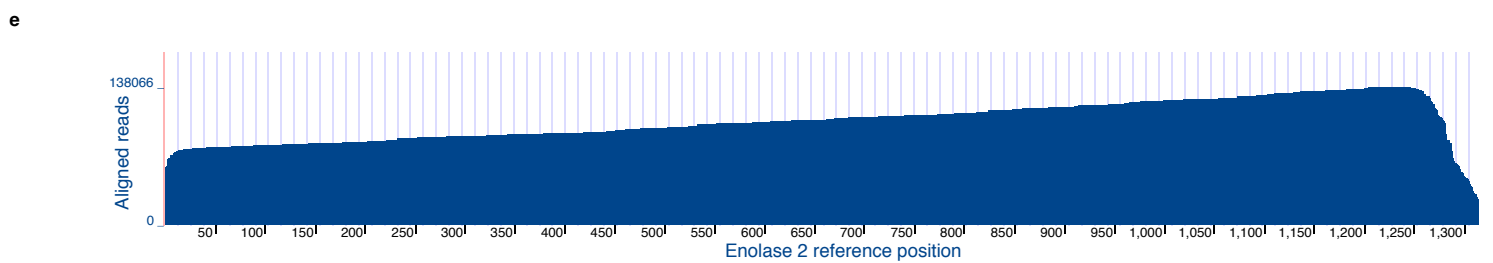

Supplement: pone.0216709.s002.pdf [file pone.0216709.s002.pdf]
